# Supplementary material for: Ocean deoxygenation and zooplankton: Very small oxygen differences matter
Source: PubMed Central journal article supplement — Sci Adv. 2018 Dec 19;4(12):eaau5180. doi: 10.1126/sciadv.aau5180 (PMC6300398; doi:10.1126/sciadv.aau5180), 2018-12-19
Supplement: aau5180_SM.pdf [file aau5180_SM.pdf]

## Supplementary Materials for

### Ocean deoxygenation and zooplankton: Very small oxygen differences matter

K. F. Wishner\*, B. A. Seibel, C. Roman, C. Deutsch, D. Outram, C. T. Shaw, M. A. Birk, K. A. S. Mislan, T. J. Adams, D. Moore, S. Riley

\*Corresponding author. Email: kwishner@uri.edu

Published 19 December 2018, *Sci. Adv.* **4**, eaau5180 (2018)  
DOI: 10.1126/sciadv.aau5180

#### This PDF file includes:

- Fig. S1. Map showing the spatial overlap of Wire Flyer transects and MOCNESS tows.
- Fig. S2. Photographs of animals discussed in the paper.
- Fig. S3. *Lucicutia hulsemannae* and *Gennadas* spp. oxygen consumption rates versus body mass and critical oxygen partial pressures.
- Fig. S4. Representative respirometry trials showing the effect of PO<sub>2</sub> on oxygen consumption rates.
- Table S1. Cruise sampling data for all gear.
- Table S2. MOCNESS sampling data and abundances for each net.
- Table S3. Metabolic rates and critical oxygen partial pressures.
- Table S4. Compilation of critical oxygen partial pressures from the literature.
- References (29–88)

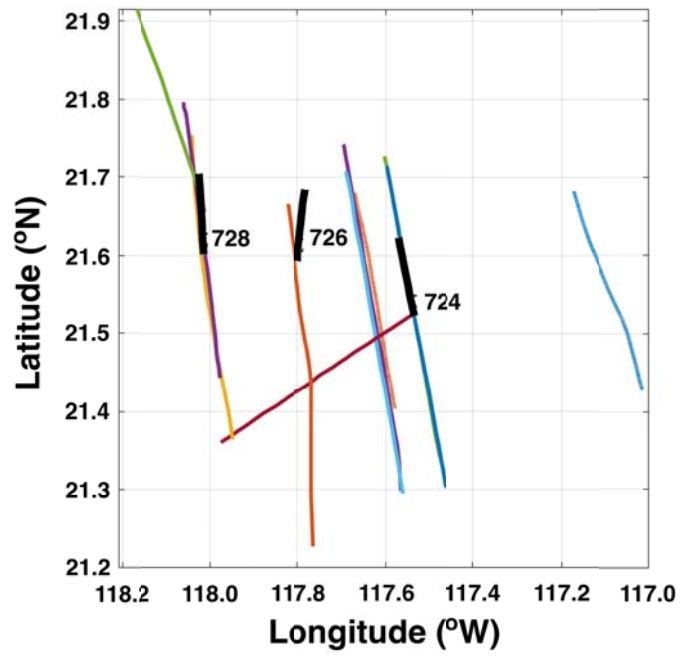

**Fig. S1. Map showing the spatial overlap of Wire Flyer transects (colored lines) and MOCNESS tows (black lines and tow numbers).**

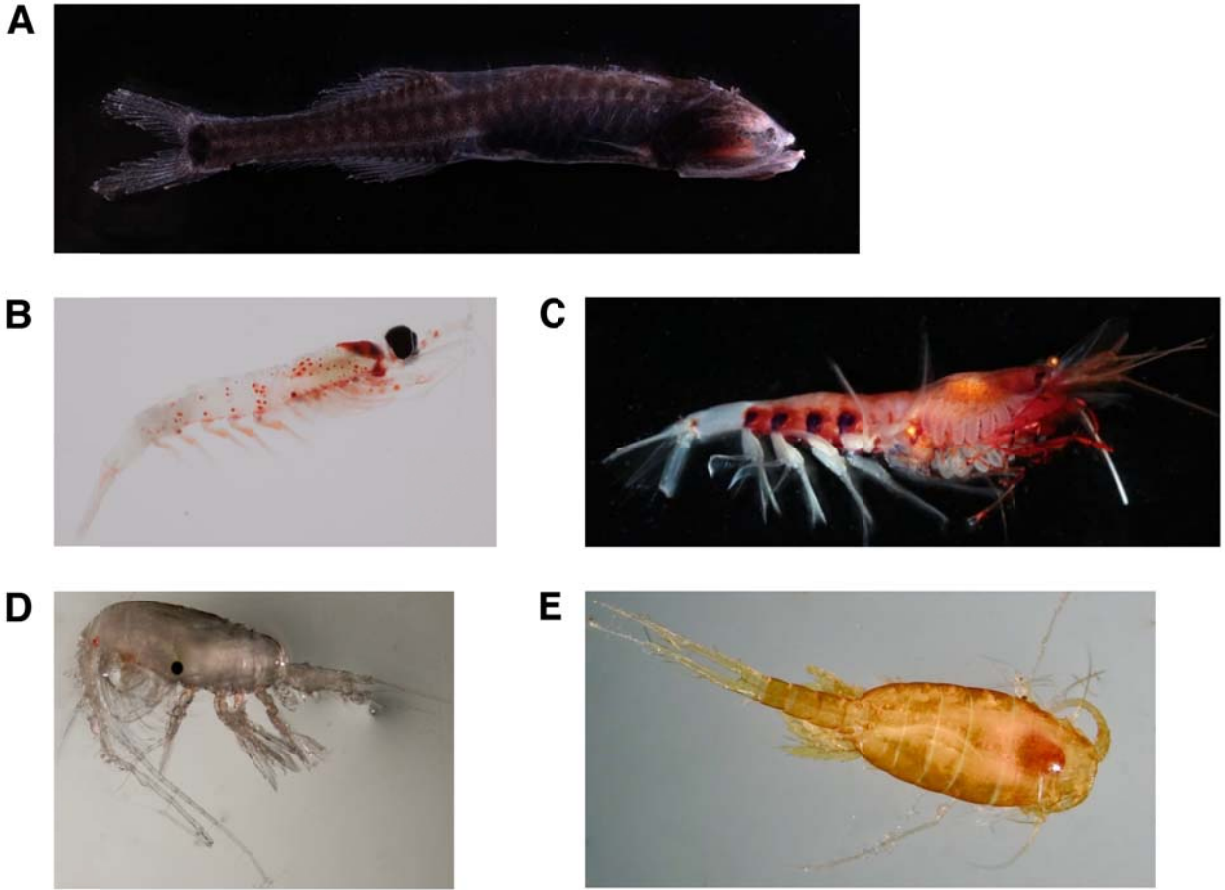

**Fig. S2. Photographs of freshly caught animals discussed in the paper, including approximate sizes of specimens collected on this cruise. A.** *Cyclothone* spp. (fish, 5 mm – 5 cm), **B.** *Nematobrachion flexipes* (euphausiid, 25 mm), **C.** *Gennadas* spp. (shrimp, 2 – 3 cm), **D.** *Pleuromamma abdominalis*. (copepod, 2 – 4 mm), **E.** *Lucicutia hulsemannae* (copepod, 6 mm).

Photographers: S. Gordon (A, B, C), D. Outram (D, E).

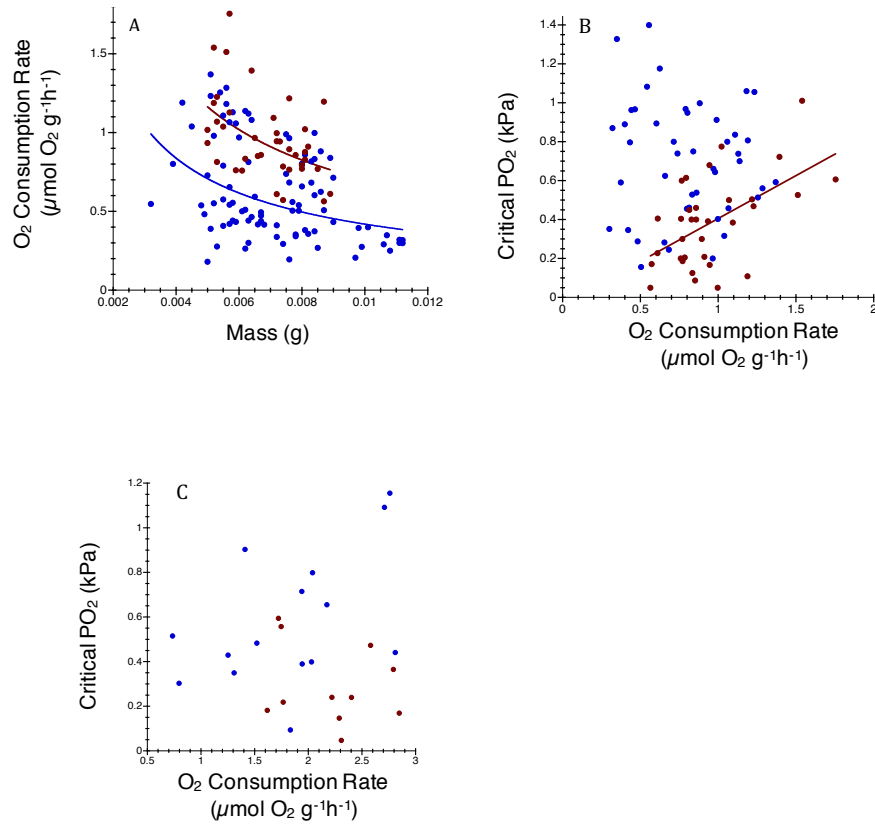

**Fig. S3. *Lucicutia hulsemannae* and *Gennadas* spp. oxygen consumption rates versus body mass and critical oxygen partial pressures. *Lucicutia hulsemannae* oxygen consumption rate vs (A) body mass and (B) critical PO<sub>2</sub> at 5°C (blue) and 8°C (red). (C) *Gennadas* spp. P<sub>crit</sub> vs O<sub>2</sub> consumption rate.**

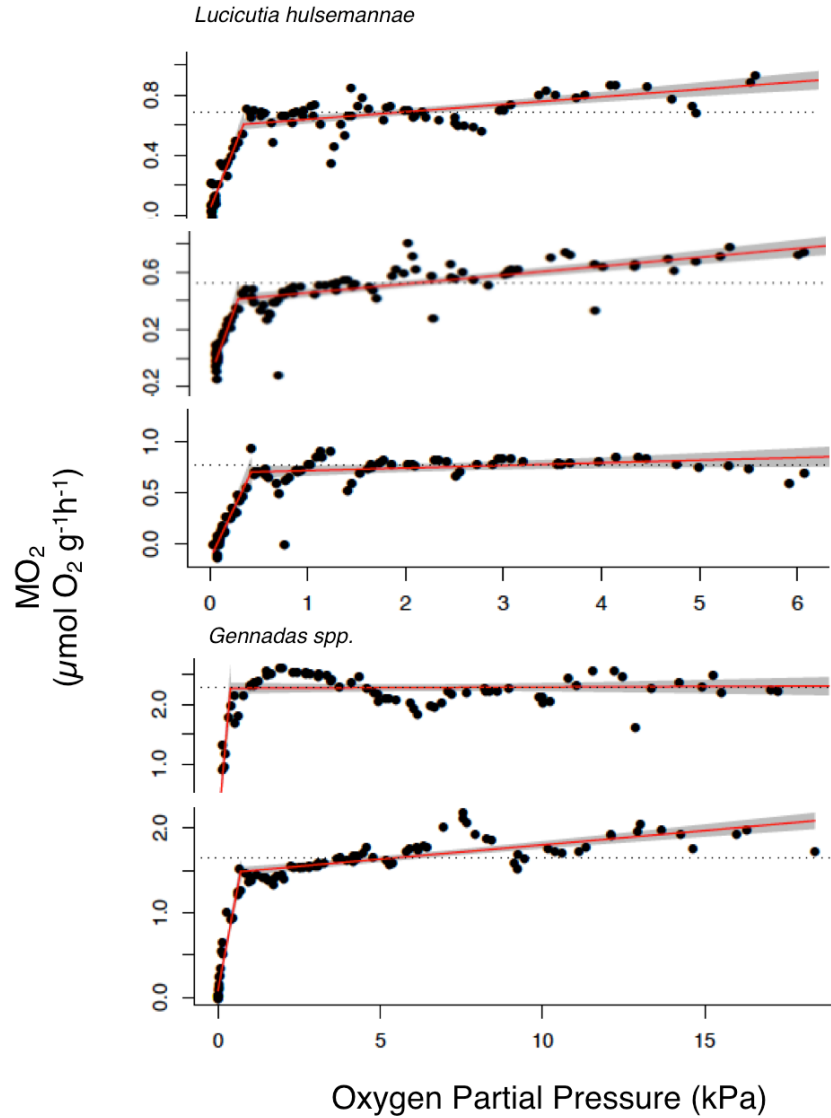

**Fig. S4. Representative respirometry trials showing the effect of  $PO_2$  on oxygen consumption rates ( $MO_2$ ) for *Lucicutia hulsemannae* (top 3 graphs) and *Gennadas spp.* (bottom 2 graphs). The intersection of red lines is the  $P_{\text{crit}}$ . Dashed lines are mean oxygen consumption rates for the regulated part of the trial.**

**Table S1. Cruise sampling data for all gear.** Location lists the start of the deployment. Time is either the start or total time interval for the deployment. For MOCNESS tows, the time of sample collection (when the net was at the targeted depth) is within the total deployment time interval. Local time is 7 hr earlier than UTC. W, Wire Flyer; MOC, MOCNESS; T, Tucker.

| Gear | Cast | Tow Type                            | Date UTC (mmdd) | Time (UTC) | Lat (°N) | Lon (°W) | Day/ Night | Depth (m) |
|------|------|-------------------------------------|-----------------|------------|----------|----------|------------|-----------|
| MOC  | 715  | Lower Oxycline                      | 0124            | 1540-2122  | 21.42    | 116.99   | D          | 600-800   |
| T    | 4    | Oblique                             | 0125            | 2144       | 21.70    | 117.18   | D          | 402-477   |
| MOC  | 716  | Vertically Stratified               | 0126            | 0400-0930  | 21.68    | 117.21   | N          | 0-1000    |
| T    | 6    | Oblique                             | 0126            | 2336       | 21.63    | 117.65   | D          | 580-621   |
| T    | 8    | Oblique                             | 0128            | 1715       | 21.60    | 117.65   | D          | 354-370   |
| WF   | 9    | OMZ & Upper Oxycline                | 0204            | 0609-1521  | 21.31    | 117.46   | N          | 0-750     |
| MOC  | 718  | Vertically Stratified               | 0128            | 1959-0157  | 21.58    | 117.65   | D          | 350-650   |
| MOC  | 719  | Vertically Stratified               | 0129            | 1800-2349  | 21.38    | 117.58   | D          | 350-650   |
| T    | 10   | Oblique                             | 0130            | 0330       | 21.66    | 117.60   | N          | 55-150    |
| T    | 11   | Oblique                             | 0130            | 1740       | 21.39    | 117.72   | D          | 205-436   |
| T    | 13   | Oblique                             | 0131            | 1730       | 21.40    | 117.59   | D          | 200-463   |
| T    | 14   | Oblique                             | 0201            | 1547       | 21.40    | 117.59   | D          | 415-566   |
| T    | 15   | Oblique                             | 0202            | 1555       | 21.71    | 117.70   | D          | 622-750   |
| T    | 16   | Oblique                             | 0202            | 1929       | 21.60    | 117.69   | D          | 383-515   |
| T    | 17   | Oblique                             | 0204            | 0116       | 21.61    | 117.68   | D          | 443-598   |
| WF   | 9    | OMZ & Upper Oxycline                | 0204            | 0609-1521  | 21.31    | 117.46   | N          | 0-750     |
| MOC  | 724  | Horizontal Feature (Upper Oxycline) | 0204            | 1700-2217  | 21.49    | 117.52   | D          | ~ 425±5   |
| T    | 18   | Oblique                             | 0204            | 2314       | 21.66    | 117.58   | D          | 362-570   |
| MOC  | 725  | Vertically Stratified               | 0205            | 1521-2211  | 21.49    | 117.52   | D          | 0-1000    |
| T    | 20   | Oblique                             | 0206            | 0121       | 21.77    | 117.62   | D          | 68-98     |
| T    | 21   | Oblique                             | 0206            | 1513       | 21.22    | 117.73   | D          | 620-751   |
| T    | 22   | Oblique                             | 0206            | 1741       | 21.29    | 117.77   | D          | 363-418   |
| WF   | 10   | OMZ & Upper Oxycline                | 0207            | 0605-1525  | 21.22    | 117.75   | N          | 0-750     |
| MOC  | 726  | Horizontal Feature (Upper Oxycline) | 0207            | 1635-2115  | 21.55    | 117.80   | D          | ~ 430±5   |
| T    | 24   | Oblique                             | 0208            | 2331       | 21.81    | 117.92   | D          | 356-530   |
| WF   | 12   | OMZ & Lower Oxycline                | 0209            | 0621-1417  | 21.44    | 117.98   | N          | 0-850     |
| MOC  | 728  | Horizontal Feature (Lower Oxycline) | 0209            | 1604-2332  | 21.53    | 118.00   | D          | ~ 800±5   |
| T    | 26   | Oblique                             | 0209            | 2352       | 21.75    | 118.03   | D          | 194-449   |
| T    | 28   | Oblique                             | 0210            | 1509       | 21.54    | 118.00   | D          | 1076-1487 |
| T    | 29   | Oblique                             | 0210            | 1859       | 21.64    | 117.99   | D          | 345-382   |
| T    | 31   | Oblique                             | 0211            | 1739       | 21.56    | 117.98   | D          | 291-464   |

**Table S2. MOCNESS sampling data and abundances for each net within a tow for species and taxa, plus total zooplankton biomass.** In the Ox column, H indicates nets included in the high oxygen category for statistical testing, while L indicates nets in the low oxygen category (only done for horizontal tows). Nets with blanks in the Ox column were not included in those tests. *P. abd* = *Pleuromamma abdominalis*. *L. hul* = *Lucicutia hulsemannae*. *N. flex* = *Nematobranchion flexipes*.

| Moc | Net | Ox | Depth<br>m | Vol Fil<br>m <sup>3</sup> | <i>P. abd</i><br>#/1000 m <sup>3</sup> | <i>L. hul</i><br>#/1000 m <sup>3</sup> | Euphausiids<br>#/1000 m <sup>3</sup> | <i>N. flex</i><br>#/1000 m <sup>3</sup> | Cyclothone<br>#/1000 m <sup>3</sup> | Biomass<br>mg/ m <sup>3</sup> |
|-----|-----|----|------------|---------------------------|----------------------------------------|----------------------------------------|--------------------------------------|-----------------------------------------|-------------------------------------|-------------------------------|
| 716 | 1   |    | 800-1000   | 2623                      | 0.00                                   | 1.14                                   | 0.38                                 | 0.00                                    | 1.14                                | 2.32                          |
|     | 2   |    | 700-800    | 905                       | 0.00                                   | 18.78                                  | 1.10                                 | 0.00                                    | 5.52                                | 3.17                          |
|     | 3   |    | 600-700    | 1069                      | 0.94                                   | 18.71                                  | 0.00                                 | 0.00                                    | 8.42                                | 3.14                          |
|     | 4   |    | 500-600    | 956                       | 0.00                                   | 24.06                                  | 0.00                                 | 0.00                                    | 6.28                                | 13.11                         |
|     | 5   |    | 400-500    | 990                       | 0.00                                   | 2.02                                   | 2.02                                 | 1.01                                    | 41.41                               | 6.69                          |
|     | 6   |    | 300-400    | 827                       | 0.00                                   | 0.00                                   | 1.21                                 | 0.00                                    | 10.88                               | 6.05                          |
|     | 7   |    | 200-300    | 778                       | 0.00                                   | 1.29                                   | 19.28                                | 7.71                                    | 1.29                                | 11.45                         |
|     | 8   |    | 100-200    | 1041                      | 5.76                                   | 0.00                                   | 143.13                               | 14.41                                   | 0.00                                | 16.55                         |
|     | 9   |    | 0-100      | 1971                      | 64.94                                  | 4.06                                   | 231.35                               | 0.00                                    | 0.00                                | 31.53                         |
| 724 | 1   |    | 420        | 1100                      | 0.00                                   | 0.00                                   | 120.91                               | 0.00                                    | 23.64                               | 9.45                          |
|     | 2   |    | 420-425    | 1143                      | 100.61                                 | 0.00                                   | 328.96                               | 5.25                                    | 25.37                               | 15.66                         |
|     | 3   | H  | 425        | 1179                      | 105.17                                 | 0.00                                   | 100.08                               | 1.70                                    | 24.60                               | 16.01                         |
|     | 4   | L  | 425        | 956                       | 0.00                                   | 0.00                                   | 23.01                                | 0.00                                    | 3.14                                | 9.15                          |
|     | 5   | L  | 425        | 1123                      | 0.89                                   | 0.00                                   | 98.84                                | 0.00                                    | 57.88                               | 9.76                          |
|     | 6   |    | 425        | 812                       | 2.46                                   | 0.00                                   | 136.70                               | 4.93                                    | 151.48                              | 16.21                         |
|     | 7   | H  | 425        | 1034                      | 236.94                                 | 0.00                                   | 187.62                               | 11.61                                   | 131.53                              | 13.89                         |
|     | 8   | H  | 425        | 1185                      | 54.01                                  | 0.00                                   | 313.08                               | 13.50                                   | 143.46                              | 19.07                         |
| 725 | 1   |    | 800-1000   | 2407                      | 0.00                                   | 2.08                                   | 0.00                                 | 0.00                                    | 5.40                                | 5.12                          |
|     | 2   |    | 700-800    | 1667                      | 0.00                                   | 21.60                                  | 0.00                                 | 0.00                                    | 7.20                                | 9.14                          |
|     | 3   |    | 600-700    | 1472                      | 0.00                                   | 38.72                                  | 0.00                                 | 0.00                                    | 8.83                                | 4.87                          |
|     | 4   |    | 500-600    | 1087                      | 0.92                                   | 81.88                                  | 1.84                                 | 0.00                                    | 18.40                               | 13.29                         |
|     | 5   |    | 400-500    | 850                       | 2.35                                   | 0.00                                   | 74.12                                | 4.71                                    | 82.35                               | 10.26                         |
|     | 6   |    | 300-400    | 1122                      | 15.15                                  | 0.00                                   | 346.70                               | 1.78                                    | 49.91                               | 20.43                         |
|     | 7   |    | 200-300    | 886                       | 4.51                                   | 0.00                                   | 148.98                               | 0.00                                    | 0.00                                | 11.87                         |
|     | 8   |    | 100-200    | 1088                      | 0.00                                   | 0.00                                   | 28.49                                | 0.00                                    | 0.92                                | 14.44                         |
|     | 9   |    | 0-100      | 1161                      | 1.72                                   | 9.47                                   | 13.78                                | 0.00                                    | 3.45                                | 24.38                         |
| 726 | 1   | L  | 425-430    | 950                       | 3.16                                   | 0.00                                   | 20.00                                | 0.00                                    | 15.79                               | 5.63                          |
|     | 2   | L  | 428-430    | 804                       | 0.00                                   | 0.00                                   | 4.98                                 | 0.00                                    | 2.49                                | 6.87                          |
|     | 3   | L  | 428-434    | 904                       | 0.00                                   | 0.00                                   | 13.27                                | 0.00                                    | 0.00                                | 6.64                          |
|     | 4   |    | 427-434    | 1010                      | 0.99                                   | 0.00                                   | 40.59                                | 0.00                                    | 27.72                               | 5.79                          |
|     | 5   | H  | 426-427    | 726                       | 166.67                                 | 0.00                                   | 84.02                                | 1.38                                    | 75.76                               | 10.55                         |
|     | 6   | H  | 426-430    | 1065                      | 59.15                                  | 0.00                                   | 113.62                               | 5.63                                    | 120.19                              | 9.96                          |
|     | 7   | H  | 430-435    | 990                       | 89.90                                  | 0.00                                   | 50.51                                | 0.00                                    | 204.04                              | 10.71                         |
|     | 8   | H  | 425-435    | 975                       | 167.18                                 | 0.00                                   | 76.92                                | 1.03                                    | 35.90                               | 10.57                         |
| 728 | 1   | L  | 800-802    | 1012                      | 0.00                                   | 11.86                                  | 0.00                                 | 0.00                                    | 11.86                               | 5.11                          |
|     | 2   | L  | 800-801    | 1110                      | 27.03                                  | 16.22                                  | 0.90                                 | 0.00                                    | 9.01                                | 6.82                          |
|     | 3   | L  | 801-803    | 1146                      | 0.00                                   | 12.22                                  | 0.87                                 | 0.00                                    | 14.83                               | 6.57                          |
|     | 4   | H  | 802-803    | 1135                      | 0.00                                   | 1.76                                   | 0.88                                 | 0.00                                    | 7.05                                | 7.89                          |
|     | 5   | H  | 800-802    | 1124                      | 0.89                                   | 1.78                                   | 0.00                                 | 0.00                                    | 4.45                                | 2.97                          |
|     | 6   | H  | 800-801    | 1111                      | 0.00                                   | 1.80                                   | 1.80                                 | 0.00                                    | 4.50                                | 6.14                          |
|     | 7   | H  | 797-801    | 1109                      | 0.00                                   | 0.90                                   | 2.71                                 | 0.00                                    | 2.71                                | 11.89                         |
|     | 8   | H  | 797-800    | 1124                      | 0.00                                   | 6.23                                   | 8.01                                 | 0.00                                    | 11.57                               | 12.36                         |

**Table S3. Metabolic rates and critical oxygen partial pressures.** Data are mean  $\pm$  SE.

| <b>Supplemental Table: Metabolic Rates and Critical PO2 measured in present study.</b> |                                 |                      |                                      |                                                                              |                                             |
|----------------------------------------------------------------------------------------|---------------------------------|----------------------|--------------------------------------|------------------------------------------------------------------------------|---------------------------------------------|
| <b>Taxa</b>                                                                            | <b>Species</b>                  | <b>Temp. °C</b>      | <b>Mean Mass g (range)</b>           | <b>Mean MO<sub>2</sub> <math>\mu</math>mol O<sub>2</sub>/g*h (range, n,)</b> | <b>Mean P<sub>crit</sub> kPa (range, n)</b> |
| Copepoda                                                                               | <i>Lucicutia hulsemannae</i>    | 5                    | 0.0067 $\pm$ 0.0014                  | 0.63 $\pm$ 0.032<br>(0.18-1.37, 91)                                          | 0.67 $\pm$ 0.04<br>(0.16-1.51, 43)          |
|                                                                                        |                                 | 8                    | 0.0067 $\pm$ 0.0014                  | 0.97 $\pm$ 0.04<br>(0.56-1.75, 39)                                           | 0.38 $\pm$ 0.04<br>(0.05-1.01, 34)          |
|                                                                                        | <i>Megacalanus</i> spp.         | 5                    | 0.04<br>(0.02-0.05)                  | 0.85 $\pm$ 0.11<br>(0.45-1.64)                                               | 1.01 $\pm$ 0.10<br>(0.55-1.65)              |
|                                                                                        |                                 | 10                   | 0.031<br>(0.02-0.04)                 | 1.53 $\pm$ 0.095<br>(1.11-2.02)                                              | 0.91 $\pm$ 0.08<br>(0.52-1.32)              |
|                                                                                        | <i>Gaussia intermedia</i>       | 10                   | 0.032 $\pm$ 0.003                    | 2.61 $\pm$ 0.32<br>(2.27-3.34, 5)                                            | 1.09 $\pm$ 0.17<br>(0.92-1.29, 5)           |
|                                                                                        | Decapoda                        | <i>Gennadas</i> spp. | 5                                    | 0.29 $\pm$ 0.03 (0.13-0.56)                                                  | 1.72 $\pm$ 0.16<br>(0.73-2.81; 17)          |
| Euphausiacea                                                                           |                                 | 10                   | 0.37 $\pm$ 0.01<br>(0.23-0.64)       | 2.25 $\pm$ 0.11<br>(1.61-2.85; 13)                                           | 0.29 + 0.05<br>(0.04-0.59; 11)              |
|                                                                                        | <i>Benthoeuphausia amblyops</i> | 5                    | 0.195                                | 2.05 (n=2)                                                                   | 0.873 (n=2)                                 |
|                                                                                        | <i>Nematobranchion flexipes</i> | 10                   | 0.089 $\pm$ 0.004<br>(0.07-0.10)     | 4.92 $\pm$ 0.48<br>(2.78-6.76; n = 9)                                        | 0.68 $\pm$ 0.08<br>(0.367 – 1.1; n = 7)     |
|                                                                                        |                                 | 20                   | 0.045 $\pm$ 0.005<br>(0.045 – 0.112) | 8.56 $\pm$ 2.37<br>(2.48-14.96; n= 5)                                        | 1.58 $\pm$ 0.41<br>(1.12-3.63; n=5)         |



**Table S4. Compilation of critical oxygen partial pressures from the literature.** Critical Oxygen Partial Pressures ( $P_{crit}$ , kPa, blue), measured as the  $PO_2$  below which the rate of oxygen consumption was no longer maintained independent of  $PO_2$ , for every marine crustacean available in the literature. The measurement temperature (red) and references are also provided.

| Species                                                                            | Family         | Temp | Pcrit (kPa) | Reference                        |
|------------------------------------------------------------------------------------|----------------|------|-------------|----------------------------------|
| <b>Shrimp-like species (Dendobranchiata, Caridea, Euphausiacea, Lophogastrida)</b> |                |      |             |                                  |
| <i>Acantheephyra acutifrons</i>                                                    | Oplophoridae   | 5    | 3.93        | Cowles et al., 1991 (43)         |
|                                                                                    |                | 10   | 3.85        |                                  |
| <i>Acantheephyra curtirostris</i>                                                  | Oplophoridae   | 5    | 3.75        | Cowles et al., 1991 (43)         |
|                                                                                    |                | 10   | 3.85        |                                  |
|                                                                                    |                | 5.5  | 1.07        | Childress, 1975 (39)             |
| <i>Acantheephyra purpurea</i>                                                      | Oplophoridae   | 7    | 3.73        | Donnelly and Torres 1988 (48)    |
|                                                                                    |                | 14   | 4.27        |                                  |
| <i>Acantheephyra smithi</i>                                                        | Oplophoridae   | 5    | 3.60        | Cowles et al., 1991 (43)         |
|                                                                                    |                | 10   | 3.64        |                                  |
|                                                                                    |                | 20   | 3.40        |                                  |
| <i>Pandalus borealis</i>                                                           | Pandaidae      | 5    | 1.89        | Dupont-Prinet et al., 2013, (49) |
|                                                                                    |                | 8    | 2.90        |                                  |
| <i>Funchalia villosa</i>                                                           | Penaeidae      | 5    | 3.07        | Donnelly and Torres 1988 (48)    |
|                                                                                    |                | 20   | 4.40        |                                  |
| <i>Gennadas valens</i>                                                             | Benthescymidae | 14   | 3.73        | Donnelly and Torres 1988 (48)    |
|                                                                                    |                | 20   | 4.40        |                                  |
| <i>Nostostomus gibbosus</i>                                                        | Oplophoridae   | 5    | 1.89        | Cowles et al., 1991 (43)         |
|                                                                                    |                | 10   | 3.73        |                                  |
| <i>Notostomus elegans</i>                                                          | Oplophoridae   | 5    | 2.20        | Cowles et al., 1991 (43)         |
|                                                                                    |                | 10   | 3.04        |                                  |
| <i>Oplophorus glacilirostris</i>                                                   | Oplophoridae   | 7    | 3.33        | Donnelly and Torres 1988 (48)    |
|                                                                                    |                | 20   | 4           |                                  |

|                                  |                  |     |       |                               |
|----------------------------------|------------------|-----|-------|-------------------------------|
| <i>Oplophorus gracilirostris</i> | Oplophoridae     | 5   | 4.67  | Cowles et al., 1991 (43)      |
|                                  |                  | 10  | 5.40  |                               |
|                                  |                  | 20  | 6.36  |                               |
|                                  |                  | 5   | 4.39  |                               |
|                                  |                  | 10  | 2.43  |                               |
|                                  |                  | 20  | 7.07  |                               |
| <i>Pandalus borealis</i>         | Pandaidae        | 5   | 1.89  | Dupont-Prinet et al 2013 (49) |
|                                  |                  | 8   | 2.90  |                               |
|                                  |                  | 5   | 3.26  |                               |
|                                  |                  | 8   | 4.66  |                               |
| <i>Penaeus aztecus</i>           | Penaeidae        | 20  | 12.27 | Chu and Gale (41)             |
|                                  |                  | 30  | 16.27 |                               |
| <i>Sergestes bisulcatus</i>      | Sergestidae      | 5   | 3.51  | Cowles et al., 1991 (43)      |
|                                  |                  | 10  | 5.23  |                               |
|                                  |                  | 20  | 9.97  |                               |
| <i>Sergestes fulgens</i>         | Sergestidae      | 5   | 3.49  | Cowles et al., 1991 (43)      |
|                                  |                  | 10  | 5.31  |                               |
|                                  |                  | 20  | 11.60 |                               |
| <i>Sergestes tenuiremis</i>      | Sergestidae      | 5   | 3.39  | Cowles et al., 1991 (43)      |
|                                  |                  | 10  | 4.25  |                               |
|                                  |                  | 20  | 7.28  |                               |
| <i>Sergia grandis</i>            | Sergestidae      | 14  | 4.40  | Donnelly and Torres 1988 (48) |
|                                  |                  | 20  | 6.27  |                               |
| <i>Sysellaspis debilis</i>       | Oplophoridae     | 7   | 3.33  | Donnelly and Torres 1988 (48) |
|                                  |                  | 14  | 4     |                               |
|                                  |                  | 20  | 4.93  |                               |
| <i>Sysellaspis debilis</i>       | Oplophoridae     | 5   | 3.23  | Cowles et al., 1991 (43)      |
|                                  |                  | 10  | 4.67  |                               |
|                                  |                  | 20  | 5.80  |                               |
| <i>Gnathophausia ingens</i>      | Gnathophausiidae | 5.5 | 0.80  | Childress 1975 (39)           |
| <i>Gnathophausia zoea</i>        | Gnathophausiidae | 5.5 | 0.93  | Childress 1975 (39)           |

|                                              |                   |     |      |                                |
|----------------------------------------------|-------------------|-----|------|--------------------------------|
| <i>Gnathophausia gigas</i>                   | Gnathophausiidae  | 4   | 1.33 | Childress 1975 (39)            |
| <i>Gnathophausia gracilis</i>                | Gnathophausiidae  | 4   | 1.36 | Childress 1975 (39)            |
| <i>Boreomysis californica</i>                | Mysidae           | 5.5 | 0.41 | Childress 1975 (39)            |
| <i>Sergestes phorcus</i>                     | Sergestidae       | 5.5 | 0.80 | Childress 1975 (39)            |
| <i>Sergestes similis</i>                     | Sergestidae       | 10  | 2.73 | Childress 1975 (39)            |
| <i>Gennadas propinquus</i>                   | Benthesicymidae   | 5.5 | 1.07 | Childress 1975 (39)            |
| <i>Systemaspis cristata</i>                  | Oplophoridae      | 5.5 | 0.97 | Childress 1975 (39)            |
| <i>Hymenodora frontalis</i>                  | Acantheephyridae  | 5.5 | 1.03 | Childress 1975 (39)            |
| <i>Nostotomus</i> spp.                       | Oplophoridae      | 4   | 1.87 | Childress 1975 (39)            |
| <i>Pasiphaea pacifica</i>                    | Pasiphaeidae      | 7.5 | 1.60 | Childress 1975 (39)            |
| <i>Pasiphaea chacei</i>                      | Pasiphaeidae      | 7.5 | 2.40 | Childress 1975 (39)            |
| <i>Pasiphaea emarginata</i>                  | Pasiphaeidae      | 5.5 | 0.57 | Childress 1975 (39)            |
| <i>Plesionika</i> sp.                        | Pandalidae        | 5.5 | 0.8  | Childress 1975 (39)            |
| <i>Euphausia superba</i> (Fall Size Class 4) | Euphausiidae      | 0.5 | 5.60 | Torres et al 1994 (78)         |
|                                              |                   | 0.5 | 4.67 |                                |
|                                              |                   | 0.5 | 5.60 |                                |
|                                              |                   | 0.5 | 5.87 |                                |
|                                              |                   | 0.5 | 6.93 |                                |
|                                              |                   | 0.5 | 4.00 |                                |
| <i>Bentheuphausia amblyops</i>               | Bentheuphausiidae | 1.5 | 2.40 | Torres and Childress 1985 (77) |
|                                              |                   | 3.5 | 2.40 |                                |
|                                              |                   | 5.5 | 2.40 |                                |
|                                              |                   | 7.5 | 5.33 |                                |
|                                              |                   | 9.5 | 8.00 |                                |
| <i>Euphausia eximia</i>                      | Euphausiidae      | 10  | 2.10 | Seibel et al., 2016 (15)       |
| <i>Thysanoessa macrura</i>                   | Euphausiidae      | 0.5 | 4.27 | Torres et al 1994 (78)         |

|                                  |                |      |      |                                  |
|----------------------------------|----------------|------|------|----------------------------------|
|                                  |                | 0.5  | 5.33 |                                  |
| <i>Euphausia pacifica</i>        | Euphausiidae   | 10   | 3    | Childress, 1975 (39)             |
| <i>Euphausia mucronata</i>       | Euphausiidae   | 13   | 0.6  | Kiko et al., 2016 (20)           |
| <i>Euphausia gibboides</i>       | Euphausiidae   | 13   | 2.4  | Kiko et al., 2016 (20)           |
| <i>Calocaris macandreae</i>      | Axiidae        | 10   | 2.00 | Anderson et al 2012 (33)         |
| <i>Palaemon adspersus</i>        | Palaemonidae   | 10   | 8.95 | Hagerman and Weber 1981 (52)     |
|                                  |                | 24   | 7.77 | Nielsen and Hagerman 1998 (63)   |
| <i>Palaemon elegans</i>          | Palaemonidae   | 10   | 1.90 | Morris and Taylor 1985 (61)      |
| <i>Palaemon varians</i>          | Palaemonidae   | 24   | 6.56 | Nielsen and Hagerman 1998 (63)   |
| <i>Pandalus platyceros</i>       | Pandaidae      | 9    | 3.07 | <i>Chu and Gale (41)</i>         |
|                                  |                | 9    |      |                                  |
| <i>Archaeomysis grebnitzkii</i>  | Mysidae        | 10   | 6.67 | Jawed 1973 (53)                  |
| <i>Neomysis awatschensis</i>     | Mysidae        | 10   | 6.67 | Jawed 1973 (53)                  |
| <i>Neotrypaea californiensis</i> | Callianassidae | 10   | 1.25 | Thompson and Pritchard 1969 (76) |
| <i>Upogebia pugettensis</i>      | Upogebiidae    | 10   | 5.33 | Thompson and Pritchard 1969 (76) |
| <i>Penaeus californiensis</i>    | Penaeidae      | 27   | 5.15 | Villarreal and Ocampo 1993 (81)  |
| <i>Penaeus indicus</i>           | Penaeidae      | 28.2 | 7.02 | Subrahmanyam 1962 (73)           |
| <i>Penaeus monodon</i>           | Penaeidae      | 27.1 | 1.41 | Allan and Maguire 1991 (31)      |
| <i>Penaeus esculentus</i>        | Penaeidae      | 25   | 3.74 | Dall 1986 (45)                   |
| <i>Trypaea australiensis</i>     | Callianassidae | 22   | 4.63 | Paterson and Thorne 1995 (66)    |
| <i>Palaemonetes pugio</i>        | Palaemonidae   | 30   | 5.20 | Cochran and Burnett 1996 (42)    |
| <i>Deosergestes corniculum</i>   | Sergestidae    | 20   | 4.67 | Donnelly and Torres 1988 (48)    |
| <i>Gennadas scutatus</i>         | Benthescymidae | 20   | 4.00 | Donnelly and Torres 1988 (48)    |

|                                   |                  |      |      |                               |
|-----------------------------------|------------------|------|------|-------------------------------|
| <i>Parasergestes armatus</i>      | Sergestidae      | 14   | 3.33 | Donnelly and Torres 1988 (48) |
| <i>Sergia splendens</i>           | Sergestidae      | 20   | 4.67 | Donnelly and Torres 1988 (48) |
| <i>Sergia talismani</i>           | Pandalidae       | 20   | 4.67 | Donnelly and Torres 1988 (48) |
| <i>Stylopandalus richardi</i>     | Oplophoridae     | 17   | 3.33 | Donnelly and Torres 1988 (48) |
| <i>Pandalus borealis</i>          | Pandalidae       | 5    | 1.89 | Dupont-Prinet et al 2013 (49) |
|                                   |                  | 8    | 2.90 |                               |
|                                   |                  | 5    | 3.26 |                               |
|                                   |                  | 8    | 4.66 |                               |
| <i>Lepidophthalmus jamaicense</i> | Callinassidae    | 25   | 1.33 | Felder 1979 (50)              |
| <i>Menippe mercenaria</i>         | Menippidae       | 25   | 7.40 | Leffler 1973 (55)             |
| <i>Palaemonetes pugio</i>         | Palaemonidae     | 30   | 6.13 | Stickle et al 1989 (72)       |
| <i>Penaeus aztecus</i>            | Panaeidae        | 20   | 5.86 | Zou and Stueben 2006 (88)     |
| <i>Nihonotrypaea japonica</i>     | Callianassidae   | 20.5 | 2.07 | Mukai and Koike 1984 (62)     |
| <i>Metapenaeus ensis</i>          | Penaeidae        | 22   | 1.85 | Wu et al 2002 (87)            |
| <b>Amphipoda</b>                  |                  |      |      |                               |
| <i>Melita longidactyla</i>        | Melitidae        | 20   | 4.05 | Wu and Or 2005 (86)           |
| <i>Gammarus duebeni</i>           | Gammaridae       | 20   | 1.34 | Agnew and Jones 1986 (29)     |
|                                   |                  | 20   | 2.67 |                               |
| <i>Echinogammarus obtusatus</i>   | Gammaridae       | 13   | 2.20 | Agnew and Taylor 1985 (30)    |
| <i>Echinogammarus pirloti</i>     | Gammaridae       | 15   | 2.20 | Agnew and Taylor 1985 (30)    |
| <i>Phronima sedentaria</i>        | Phronimidae      | 10   | 2.13 | Childress 1975 (39)           |
| <i>Hyperia galba</i>              | Hyperidae        | 10   | 2.47 | Childress 1975 (39)           |
| <i>Paracallisoma coecus</i>       | Scopelocheiridae | 5.5  | 1.07 | Childress 1975 (39)           |

|                            |                |     |      |                        |
|----------------------------|----------------|-----|------|------------------------|
| <i>Eusirus antarcticus</i> | Eusiridae      | 0.5 | 5.60 | Torres et al 1994 (78) |
| <i>Cylopus lucasii</i>     | Cylloppodidae  | 0.5 | 4.13 | Torres et al 1994 (78) |
|                            |                | 0.5 | 5.47 |                        |
| <i>Cyphocaris faurei</i>   | Cyphocarididae | 0.5 | 4.40 | Torres et al 1994 (78) |
| <i>Cyphocaris richardi</i> | Cyphocarididae | 0.5 | 4.13 | Torres et al 1994 (78) |
|                            |                | 0.5 | 4.13 |                        |
|                            |                | 0.5 | 4.13 |                        |
| <i>Primno macropa</i>      | Phrosinidae    | 0.5 | 4.67 | Torres et al 1994 (78) |
|                            |                | 0.5 | 4.27 |                        |
|                            |                | 0.5 | 4.93 |                        |
| <i>Vibilia stebbingi</i>   | Vibiliidae     | 0.5 | 3.87 | Torres et al 1994 (78) |
|                            |                | 0.5 | 4.67 |                        |

### Copepoda

|                                |               |     |      |                           |
|--------------------------------|---------------|-----|------|---------------------------|
| <i>Tigriopus brevicornis</i>   | Harpacticidae | 20  | 1.20 | McAllen et al., 1999 (57) |
|                                |               | 30  | 2.13 |                           |
| <i>Gaussia princeps</i>        | Metridinidae  | 5   | 1.33 | Childress, 1976 (40)      |
|                                |               | 7   | 1.40 |                           |
|                                |               | 10  | 1.47 |                           |
| <i>Bathycalanus bradyi</i>     | Megacalanidae | 4   | 0.53 | Childress 1975 (39)       |
| <i>Bathycalanus princeps</i>   | Megacalanidae | 5.5 | 0.97 | Childress 1975 (39)       |
| <i>Calanus finmarchicus</i>    | Calanidae     | 15  | 6.91 | Marshall et al. 1935 (56) |
| <i>Pleuromamma abdominalis</i> | Calanidae     | 11  | 1.90 | Kiko et al., 2016 (20)    |
|                                |               | 23  | 6.30 |                           |
| <i>Undinula vulgaris</i>       | Calanidae     | 11  | 2.70 | Kiko et al., 2016 (20)    |
|                                |               | 23  | 6.60 |                           |

### Isopoda

|                          |           |    |      |                        |
|--------------------------|-----------|----|------|------------------------|
| <i>Idotea emarginata</i> | Idoteidae | 15 | 8.00 | Vetter et al 1999 (80) |
|                          |           | 10 | 6.00 |                        |
|                          |           | 5  | 4.00 |                        |
| <i>Idotea baltica</i>    | Idoteidae | 10 | 5.00 | Vetter et al 1999 (80) |

|                                |               |       |       |                                 |
|--------------------------------|---------------|-------|-------|---------------------------------|
|                                |               | 15    | 7.00  |                                 |
| <i>Anuropus bathypelagicus</i> | Anuropidae    | 5.5   | 1.87  | Childress 1975 (39)             |
| <b>Brachyuran Crabs</b>        |               |       |       |                                 |
| <i>Bythograea thermydron</i>   | Bythograeidae | 2     | 1.20  | Mickel and Childress, 1982 (60) |
|                                |               | 12    | 1.87  |                                 |
|                                |               | 25    | 2.53  |                                 |
| <i>Callinectes sapidus</i>     | Portunidae    | 17    | 3.57  | Brill et al. (2015) (36)        |
|                                |               | 23    | 4.2   |                                 |
|                                |               | 28    | 7.98  |                                 |
|                                |               | 25    | 5.00  | Tankersley and Wieber 2000 (74) |
|                                |               | 25    | 12.00 | Tankersley and Wieber 2000 (74) |
| <i>Callinectes danae</i>       | Portunidae    | 25    | 12.93 | Rantin et al 1996 (68)          |
| <i>Callinectes similis</i>     | Portunidae    | 24    | 5.73  | Das and Stickle 1993 (46)       |
| <i>Rhithropanopeus harrisi</i> | Panopeidae    | 10    | 1.77  | Diamond et al 1989 (47)         |
| <i>Panopeus herbstii</i>       | Panopeidae    | 25    | 3.75  | Leffler 1973 (55)               |
| <i>Carcinus maenas</i>         | Portunidae    | 15    | 1.30  | Forgue et al 1992 (51)          |
|                                |               | 7     | 2.85  | Robertson et al. 2002 (69)      |
|                                |               | 15    | 3.76  |                                 |
|                                |               | 22    | 8.03  |                                 |
|                                |               | 15    | 8.80  | Taylor 1976 (75)                |
|                                |               | 10    | 5.33  |                                 |
|                                |               | 18    | 8.00  |                                 |
|                                |               | 10    | 8.00  |                                 |
| <i>Cancer pagurus</i>          | Cancridae     | 10    | 8.00  | Bradford and Taylor 1982 (34)   |
| <i>Corystes cassivelaunus</i>  | Corystidae    | 10    | 3.33  | Bridges and Brand 1980 (35)     |
| <i>Maja brachydactyla</i>      | Majidae       | 18.74 | 7.69  | Cerezo Valverde et al 2012 (79) |
|                                |               | 17.79 | 8.18  |                                 |
|                                |               | 18.57 | 7.65  |                                 |
|                                |               | 19.29 | 7.32  |                                 |
|                                |               | 18.67 | 5.06  |                                 |
|                                |               | 22.14 | 11.18 |                                 |
|                                |               | 21.83 | 8.99  |                                 |

|                                               |               |       |         |                                 |
|-----------------------------------------------|---------------|-------|---------|---------------------------------|
|                                               |               | 23.06 | 9.32    |                                 |
|                                               |               | 25.95 | 9.5718  |                                 |
|                                               |               | 26.33 | 10.3803 |                                 |
| <i>Eriocheir sinensis</i>                     | Varunidae     | 15    | 2.10    | Forgue et al 1992 (51)          |
| <i>Metacarcinus magister</i>                  | Bythograeidae | 8     | 4.00    | McMahon et al 1979 (59)         |
| <i>Lithodes santolla</i>                      | Lithodidae    | 12    | 6.00    | Paschke et al 2010 (65)         |
|                                               |               | 11    | 4.70    | Alter et al 2015 (32)           |
| <i>Pugettia producta</i>                      | Epialtidae    | 15    | 9.33    | Weymouth et al 1944 (83)        |
| <i>Chionoecetes opilio</i>                    | Oregoniidae   | 2.2   | 5.27    | McLeese and Watson 1968 (58)    |
| <b>Anomuran and Galatheid Crabs</b>           |               |       |         |                                 |
| <i>Petrolisthes laevigatus</i><br>(Juvenile)  | Porcellanidae | 11    | 5.20    | Alter et al 2015 (32)           |
| <i>Munida quadrispina</i>                     | Munididae     | 10    | 0.43    | Burd 1985 (37)                  |
|                                               |               | 9     | 0.64    | Chu and Gale (41)               |
| <i>Pleuroncodes monodon</i><br>(adult)        | Munididae     | 13    | 0.50    | Kiko et al 2015 (54)            |
| <i>Pleuroncodes planipes</i>                  | Munididae     | 10    | 0.28    | Quetin and Childress, 1976 (67) |
|                                               |               | 15    | 0.3     |                                 |
|                                               |               | 20    | 0.42    |                                 |
|                                               |               | 25    | 0.63    |                                 |
| <i>Galathea strigosa</i> (11.8 g)<br>(47.3 g) | Galatheididae | 10    | 7.33    | Bridges and Brand 1980 (35)     |
|                                               |               | 10    | 6.00    |                                 |
| <b>Astacidea (lobsters)</b>                   |               |       |         |                                 |
| <i>Jasus edwardsii</i>                        | Palinuridae   | 13    | 7.31    | Waldron 1991 (82)               |
|                                               |               | 15    | 10.40   |                                 |
| <i>Panulirus interruptus</i>                  | Palinuridae   | 20    | 5.18    | Winget 1969 (85)                |
|                                               |               | 13    | 5.23    |                                 |
|                                               |               | 20    | 6.58    | Ocampo et al 2003 (64)          |
|                                               |               | 27    | 7.61    |                                 |
| <i>Panulirus cygnus</i>                       | Palinuridae   | 15    | 4.66    | Crear and Forteach 2001 (44)    |
|                                               |               | 23    | 5.66    |                                 |



|                            |             |    |      |                             |
|----------------------------|-------------|----|------|-----------------------------|
|                            |             | 31 | 6.69 |                             |
| <i>Nephrops norvegicus</i> | Nephropidae | 12 | 6.30 | Schmitt and Uglow 1998 (70) |
| <i>Homarus gammarus</i>    | Nephropidae | 15 | 4.36 | Spoek 1974 (71)             |
